# Supplementary material for: Ovine HSP90AA1 Expression Rate Is Affected by Several SNPs at the Promoter under Both Basal and Heat Stress Conditions
Source: PLoS One. 2013 Jun 24;8(6):e66641. doi: 10.1371/journal.pone.0066641 (PMC3691178; doi:10.1371/journal.pone.0066641)
Supplement: Table S1 — SNP frequencies of the polymorphisms found at the HSP90AA1 promoter as described in Marcos-Carcavilla’s work [24] . (XLSX) [file pone.0066641.s004.xlsx]

## Sheet: Table S1
Polimorphism	Genotype	Nºinviduals	Frequency
C/G-660	CC CG GG	61 37 9	0.5701 0.3458 0.0841
C/A-601	CC CA AA	75 27 5	0.7009 0.2523 0.0467
A/G-528	AA AG GG	64 37 6	0.5981 0.3458 0.0561
T/G-524	TT TG GG	77 26 4	0.7196 0.2430 0.0374
G/A-522	GG GA AA	100 6 1	0.9346 0.0561 0.0093
T/G-468	TT TG GG	77 26 4	0.7196 0.2430 0.0374
G/A-444	GG GA AA	90 16 1	0.8411 0.1495 0.0093
G/A-304	GG GA AA	106 1 0	0.9907 0.0093 0.0000
G/A-296	GG GA AA	100 6 1	0.9346 0.0561 0.0093
C/T-295	CC CT TT	87 17 3	0.8131 0.1589 0.0280
C/G-252	CC CG GG	99 8 0	0.9252 0.0748 0.0000
