# Supplementary material for: Ovine HSP90AA1 Expression Rate Is Affected by Several SNPs at the Promoter under Both Basal and Heat Stress Conditions
Source: PLoS One. 2013 Jun 24;8(6):e66641. doi: 10.1371/journal.pone.0066641 (PMC3691178; doi:10.1371/journal.pone.0066641)
Supplement: Table S2 — Genotype contrasts of G/C−660-A/C−601-A/G−522-A/G−444. Estimates, standard error (SE), t values and p values of significant contrasts among genotypes G/C−660-A/C−601-A/G−522-A/G−444 of the HSP90AA1 gene promoter normalized with HSP90AB1 in each treatment (Control, July and August). Also Fold change (FC) and the 95% FC confidence interval (FCup-FClow) are included. (XLSX) [file pone.0066641.s005.xlsx]

## Sheet: Table S2
Genotype contrast	Treatment	Estimate	SE	Pr > |t|	FC	FCup	FCdown
cc cc GG AG/cc cc AG GG	August	-1.5908	0.3603	0.0001	3.01216	4.91431	1.84627
CC cc gg AG/GG cc gg GG	August	-1.5856	0.3322	0.0001	3.00133	4.71322	1.91121
cc CC gg AG/cc AC gg GG	August	-1.5814	0.3749	0.0001	2.9926	4.9802	1.79825
CC cc gg AG/CG cc gg GG	August	-1.5418	0.3342	0.0001	2.91158	4.58471	1.84903
CC cc gg ag/CG cc gg ag	August	-1.5216	0.4037	0.0002	2.87109	4.96864	1.65904
CC cc GG AG/CG cc AG GG	August	-1.4549	0.3669	0.0001	2.74138	4.5128	1.66529
CC CC gg AG/CG AC gg GG	August	-1.3656	0.3601	0.0002	2.57683	4.20293	1.57987
cc cc gg AG/cc cc gg GG	August	-1.1935	0.3343	0.0004	2.28707	3.60182	1.45223
CC cc gg gg/GG cc gg gg	August	-0.3921	0.08263	0.0001	1.3123	1.46821	1.17295
CC cc gg gg/CG cc gg gg	August	-0.3483	0.0877	0.0001	1.27306	1.43415	1.13007
CG cc AG gg/GG cc GG gg	Control	-0.674	0.07556	0.0001	1.59549	1.76797	1.43983
CG cc AG GG/GG cc GG AG	Control	-0.6617	0.1989	0.0009	1.58195	2.07275	1.20736
CG cc ag gg/CC cc ag gg	Control	-0.6209	0.1562	0.0001	1.53783	1.90139	1.24379
cg cc AG gg/cg cc GG gg	Control	-0.3803	0.08402	0.0001	1.30161	1.459	1.1612
CG cc gg gg/GG cc gg gg	Control	-0.2937	0.08392	0.0005	1.22578	1.37381	1.0937
