# Supplementary material for: Ovine HSP90AA1 Expression Rate Is Affected by Several SNPs at the Promoter under Both Basal and Heat Stress Conditions
Source: PLoS One. 2013 Jun 24;8(6):e66641. doi: 10.1371/journal.pone.0066641 (PMC3691178; doi:10.1371/journal.pone.0066641)
Supplement: Table S3 — Genotype contrasts of A/C−601-A/G522-A/G−444. Estimates, standard error (SE), t values and p values of significant contrasts among genotypes A/C−601-A/G522-A/G−444 of the HSP90AA1 gene promoter normalized with HSP90AB1 in each treatment (Control, July and August). Also Fold change (FC) and the 95% FC confidence interval (FCup-FClow) are included. (XLSX) [file pone.0066641.s006.xlsx]

## Sheet: Table S3
Genotype contrast	Treatment	Estimate	SE	Pr > |t|	FC	FCup	FCdown
cc GG AG / cc AG GG	August	-0.47	0.1761	0.0077	1.38511	1.75949	1.09039
cc gg AG / cc gg GG	August	-0.3922	0.1396	0.0051	1.31239	1.58647	1.08567
cc AG gg / cc GG gg	control	-0.47	0.06129	0.0001	1.38511	1.50538	1.27445
cc AG GG / cc GG AG	control	-0.4571	0.1447	0.0016	1.37278	1.671	1.12778
