# Supplementary material for: Ovine HSP90AA1 Expression Rate Is Affected by Several SNPs at the Promoter under Both Basal and Heat Stress Conditions
Source: PLoS One. 2013 Jun 24;8(6):e66641. doi: 10.1371/journal.pone.0066641 (PMC3691178; doi:10.1371/journal.pone.0066641)
Supplement: Table S5 — Hardy-Weinberg equilibrium analysis of the 7SNPs of interest at HSP90AA1 gene promoter on trios population. (XLSX) [file pone.0066641.s008.xlsx]

## Sheet: Table S5
SNP Name	Geno Indiv	Position	ObsHET	PredHET	HWpval	MAF	Alleles
HSP90 660	3/29/25	660	0.509	0.426	0.215	0.307	GC
HSP90 601	0/19/38	601	0.333	0.278	0.331	0.167	AC
HSP90 528	2/30/25	528	0.526	0.419	0.108	0.298	GA
HSP90 524	0/18/39	524	0.316	0.266	0.328	0.158	GT
HSP90 522	0/2/55	522	0.035	0.034	1	0.018	AG
HSP90 468	0/18/39	468	0.316	0.266	0.328	0.158	GT
HSP90 444	0/6/51	444	0.105	0.1	1	0.053	AG
Geno Indiv: Number of indiduals with each genotype
ObsHET: Observed heterozigosity
PredHET: Predicted heterozigosity
HWpval: Hardy-Weinberg p-value
