# Supplementary material for: Ovine HSP90AA1 Expression Rate Is Affected by Several SNPs at the Promoter under Both Basal and Heat Stress Conditions
Source: PLoS One. 2013 Jun 24;8(6):e66641. doi: 10.1371/journal.pone.0066641 (PMC3691178; doi:10.1371/journal.pone.0066641)
Supplement: Table S6 — LD analyses from trios population with PLINK software. Linkage disequilibrium values between each couple of SNPs are shown. The couples of SNPs in bold show a high degree of linkage disequilibrium between them. (XLSX) [file pone.0066641.s009.xlsx]

## Sheet: Table S6
SNP 1	SNP 2	R2
SNP-660	SNP-601	0.028777
SNP-660	SNP-528	0.950111
SNP-660	SNP-524	0.0387844
SNP-660	SNP-522	0.0400589
SNP-660	SNP-468	0.0387844
SNP-660	SNP-444	0.000952179
SNP-601	SNP-528	0.0242574
SNP-601	SNP-524	0.923077
SNP-601	SNP-522	0.00454545
SNP-601	SNP-468	0.923077
SNP-601	SNP-444	0.0588235
SNP-528	SNP-524	0.0343234
SNP-528	SNP-522	0.0416202
SNP-528	SNP-468	0.0343234
SNP-528	SNP-444	0.00186372
SNP-524	SNP-522	0.00571096
SNP-524	SNP-468	1
SNP-524	SNP-444	0.0542986
SNP-522	SNP-468	0.00571096
SNP-522	SNP-444	0.00427807
SNP-468	SNP-444	0.0542986
