# Supplementary material for: Ovine HSP90AA1 Expression Rate Is Affected by Several SNPs at the Promoter under Both Basal and Heat Stress Conditions
Source: PLoS One. 2013 Jun 24;8(6):e66641. doi: 10.1371/journal.pone.0066641 (PMC3691178; doi:10.1371/journal.pone.0066641)
Supplement: Table S8 — Predicted transcription factor binding sites from ALGENN-PROMO software. (XLSX) [file pone.0066641.s011.xlsx]

## Sheet: Tabla S8
SNP	Transcription Factor	DNA binding sequence	References
-660 ggacccccc[G/C]aaacccct	AP-2alphaA C/EBPalpha NFI/CTF VDR T3R-alpha RXR-alpha RAR-beta	ccccC Caa cCaaaccc Caaaccc Gacccccc [C /G]aaaccc cc[C /G]aaacccc	Regulation of transcription. Williams et al. 1988 Regulation of transcriptionon. Canettieri et al., 2012 Regulation of transcription. Gronostajski, 2000 Regulation of transcription. Meyer et al. 2012 Regulation of transcription. Brent et al., 1991 Response to stress. Meyer et al. 2012 Response to stress. Lee et al 2000
-601 cctgtgaca[A/C]gggac	C/EBPbeta c-Jun JunB C/EBPalpha p53 c-Fos Nkx2-1 COE1 GR-beta Fra-1 HES-1 USF1	acaAg tgaca[A/C] tgacaA caA gtgacaAg tgacaAg gacaAg caAggga aAggga tgacaA caCggga caCgggac	Transcriptional activator in vitro and in vivo. Akira et al. 1990 Regulation of transcription. Kardassis et al. 1999 Regulation of transcription. Bakin and Curran, 1999 Regulation of transcription. Canettieri et al., 2012 Regulation of transcription. Harmes et al 2003 Regulation of transcription. Bakin and Curran, 1999 Positive regulator of transcription. Minoo, 2008 Positive regulation of transc…
-528 -524 -522 ggccc[G/A]tag[G/T]c[A/G]ggggg	GR-beta Sp1 AP-2alphaA E2F-1 SRF YY1 LF-A1 c-Fos Fra-1 JunD c-Jun JunB Pbx1b	agGcG cAtagGcGg;AtagGcGgg cGggg GcGggggg ccAtagGcGggg gcccAt AtagGcA AtagTcA tagTcA gTcAgg tagTcA tagTcA cGtagGcAggg	Regulation of transcription. Stöcklin et al. 1996; Shibata, et al. 1997 Regulation of transcription. Csermely et al.,1998; von Boehmer and Nolting 2008 Regulation of transcription. Williams et al. 1988 Positive transcriptional regulator. Kim et al. 2008 Regulation of transcription. Freddie et al. 2007 Transcription corepressor/coactivator. Park, 1991; Response to stress. Li et a. 1997 Regulation …
-468 cgctt[G/T]aaccacc	VDR RXR-alpha AR AML1 Fra-1 C/EBPalpha C/EBPbeta Nkx2-1	gcttGaac tGaacc Gaaccac tGaaccacc tGaac ttG ttG cttGaa	Regulation of transcription. Meyer et al. 2012 Regulation of transcription. Meyer et al. 2012 Regulation of transcription. Slagsvold et al. 2001 Regulation of transcription. Bakshi et al, 2012 Regulation of transcription. Singh, et al. 2010 Regulation of transcription. Canettieri et al., 2012 Transcriptional activator in vitro and in vivo. Akira et al. 1990 Positive regulator of transcription. Mi…
-444 tttacttttct[A/G]gacttc	TFIID SXR:RXR-alpha CP2 GR-alpha Nrf2:MafK	ttttctA tctGgactt ctGgactt ctGg tttctGg	Regulation of transcription. Csermely et al.,1998 Regulation of transcription. Meyer et al. 2012 Regulation of transcription. Bose, et al 2006. Regulation of transcription. Stöcklin et al. 1996 PMID: 8878484; Shibata, et al. 1997 Response to stress. You et al 2011.
